1 **First report and multilocus genotyping of *Enterocytozoon bieneusi* from Tibetan**

2 **pigs in southwestern China**

3 **Run Luo<sup>1¶</sup> , Leiqiong Xiang<sup>1¶</sup> , Haifeng Liu<sup>1¶</sup> ,Zhijun Zhong<sup>1¶</sup> , Li Liu<sup>2</sup> ,Lei**

4 **Deng<sup>1</sup> ,Yuan Song<sup>1</sup>, Ling Liu<sup>1</sup>,Xiangming Huang<sup>2</sup>, Ziyao Zhou<sup>1</sup>, Hualin Fu<sup>1</sup>,Yan**

5 **Luo<sup>1</sup>,Guangneng Peng<sup>1\*</sup>**

6 <sup>1</sup>The Key Laboratory of Animal Disease and Human Health of Sichuan Province,

7 College of Veterinary Medicine, Sichuan Agricultural University, Chengdu, Sichuan

8 Province 611130, China

9 <sup>2</sup>Chengdu Giant Panda Breeding Research Base, Chengdu, Sichuan Province 625001,

10 China

11

12 Corresponding author

13 E-mail:\* pgn.sicau@163.com (GP)

14 ¶These authors contributed equally to this work.

15

16

17

18

19

20

21

22

## 23 **Abstract**

24 *Enterocytozoon bieneusi* is a common intestinal pathogen and a major cause of  
25 diarrhea and enteric diseases in a variety of animals. While the *E. bieneusi* genotype  
26 has become better-known, there are few reports on its prevalence in the Tibetan pig.  
27 This study investigated the prevalence, genetic diversity, and zoonotic potential of *E.*  
28 *bieneusi* in the Tibetan pig in southwestern China. Tibetan pig feces (266 samples)  
29 were collected from three sites in the southwest of China. Feces were subjected to  
30 PCR amplification of the internal transcribed spacer (ITS) region. *E. bieneusi* was  
31 detected in 83 (31.2%) of Tibetan pigs from the three different sites, with 25.4% in  
32 Kangding, 56% in Yaan and 26.7% in Qionglai. Age group demonstrated the  
33 prevalence of *E. bieneusi* range from 24.4%( aged 0 to 1 years) to 44.4%( aged 1 to 2  
34 years). Four genotypes of *E. bieneusi* were identified: two known genotypes EbpC  
35 (n=58), Henan-IV (n=24) and two novel genotypes, SCT01 and SCT02 (one of each).  
36 Phylogenetic analysis showed these four genotypes clustered to group 1 with zoonotic  
37 potential. Multilocus sequence typing (MLST) analysis three microsatellites (MS1,  
38 MS3, MS7) and one minisatellite (MS4) revealed 47, 48, 23 and 47 positive  
39 specimens were successfully sequenced, and identified ten, ten, five and five  
40 genotypes at four loci, respectively. This study indicates the potential danger of *E.*  
41 *bieneusi* to Tibetan pigs in southwestern China, and offers basic data for preventing  
42 and controlling infections.

43

## 44 **Introduction**

45 Microsporidia are obligate intracellular eukaryotic pathogens, classified as fungi,  
46 which are composed of approximately 1300 species in 160 genera[1]. To date, 17  
47 microsporidia species are known to infect humans, and of these, *E. bienersi* is the  
48 most prevalent, accounting for over 90% of cases of human microsporidiosis[2].  
49 Since its first detection in an HIV/AIDS patient in 1985, a growing literature attests to  
50 *E. bienersi* expanding range of hosts [3-5]. In humans, infection by microsporidia  
51 results in self-limiting diarrhea and malabsorption, most seriously,  
52 immunocompromised and immunocompetent patients more susceptible to *E. bienersi*  
53 infection[6]. Normally, fecal-oral routes serve as the main infection pathways in  
54 humans and animals, while human inhalation of *E. bienersi* spores has also been  
55 documented[7, 8].

56 PCR-based molecular techniques may be used to analyze the *E. bienersi* genome,  
57 and for diagnosis. Based on the nested PCR amplification of internal transcribed  
58 spacers (ITS) of small subunits of ribosomal rRNA (SSU rRNA), over 240 *E.*  
59 *bienersi* genotypes have been identified globally[9-11]. Phylogenetic analysis reveals  
60 that these genotypes clustered into nine groups. Group 1 is considered zoonotic, and is  
61 composed of genotypes from humans and a few animals, while groups 2-9 have  
62 particular host associations or are found in wastewater[5, 11]. To better comprehend  
63 *E. bienersi* genetic diversity and molecular characteristics, high-resolution multi-  
64 locus sequence typing (MLST) using three microsatellites (MS1, MS3 and MS7) and  
65 one minisatellite (MS4) as markers was used to explore genotype taxonomy and  
66 transmission routes [9, 12, 13].

67 In the southwest of China, Tibetan pigs are widely kept for livelihood and are  
68 economically important for farmers, especially on the plateau. Tibetan pigs have firm  
69 black hair which differs from that of the common pig, and are sturdy, outdoor  
70 foragers. They may act as reservoirs for *E. bieneusi* spores and zoonotic transmission  
71 of disease. Although much research has been carried out on *E. bieneusi*[14-16], few  
72 studies have examined its epidemiology or Tibetan pig-associated genomes in  
73 China[17, 18], and Tibetan pigs in southwestern China have been entirely unstudied.  
74 Therefore, this study aimed to establish the incidence and molecular characteristics of  
75 *E. bieneusi* in Tibetan pigs, to use ITS and MLST to evaluate its genetic diversity, and  
76 to assess the potential for zoonotic transmission of microsporidiosis between Tibetan  
77 pigs and humans.

78

## 79 **Materials and methods**

### 80 **Ethics statement**

81 The study was conducted in accordance with the Research Ethics Committee and  
82 the Animal Ethics Committee of Sichuan Agricultural University. Prior to fecal  
83 specimen collection, permission was obtained from the keepers of the animals  
84 whenever possible.

### 85 **Collection of Tibetan pig fecal specimens**

86 Fresh fecal specimens were collected from 266 Tibetan pigs during June–October  
87 2017. Samples were obtained mainly from three cities in Sichuan province,  
88 southwestern of China, including Yaan (n=50), Kangding (n=201) and Qionglai

89 (n=15) (Table 1). The ages of Tibetan pigs sampled ranged from 1 to 2 years.  
90 Specimens were collected using sterile disposable latex gloves immediately after  
91 being defecated on to the ground, and transferred into 50 ml plastic containers. All  
92 experimental Tibetan pigs were not any diarrheic or gastrointestinal conditions.  
93 Samples were stored at 4 °C in 2.5% (w/v) potassium dichromate.

## 94 **DNA extraction**

95 Before conducting DNA extraction, potassium dichromate was removed from the  
96 fecal samples with distilled water by centrifugation for 10 minutes at  $1500 \times g$ , three  
97 times. Genomic DNA was extracted from 200 mg of washed fecal matter using the  
98 EZNA1 Stool DNA kit (Omega Biotek, Norcross, GA, USA). Prior to use in PCR  
99 analysis, DNA was stored and frozen at  $-20\text{ }^{\circ}\text{C}$ .

## 100 **PCR amplification**

101 *E. bieneusi* species/genotypes were determined using a nested PCR amplification of  
102 the entire ITS region, and positive specimens were further detected by MLST  
103 analyses using the MS1, MS3, MS4, and MS7 loci. The primers and cycling  
104 parameters implemented for these reactions were as previously described[12, 19].  
105 Negative controls were included in all PCR analyses. The secondary PCR products  
106 were subjected to electrophoresis in a 1.5% agarose gel and visualized under UV light  
107 by staining the gel with GoldView (Solarbio, China).

## 108 **Nucleotide sequencing and phylogenetic analysis**

109 Secondary PCR amplicons of anticipated size were sequenced in both directions by  
110 Life Technologies (Guangzhou, China) with an ABI 3730DNA Analyzer (Applied

111 Biosystems, Foster City, CA, USA) using the BigDye® Terminator v3.1 cycle  
112 sequencing kit. Sequence accuracy was confirmed by bidirectional sequencing, and  
113 new PCR secondary products were re-sequenced, if necessary. To identify the *E.*  
114 *bieneusi* genotype, the sequences generated were respectively aligned with known  
115 reference sequences using BLAST and ClustalX 1.83. Mega 7.0 was used to construct  
116 the phylogenetic tree using the neighbor-joining (NJ) method (the Kimura two  
117 parameter model) with 1000 bootstrap replicates[20]. Novel genotype(s) of *E.*  
118 *bieneusi* were named according to the established system of nomenclature[21].

## 119 **Statistical analysis**

120 The variation in *E. bieneusi* infection rates in Tibetan pigs between different areas,  
121 gender, and ages were compared using the Chi-square test. All tests were two-sided,  
122 with  $P < 0.05$  indicating statistical significance. SPSS version 22.0 was used on all  
123 data. 95% confidence intervals (95% CIs) were calculated to explore the strength of  
124 the association between *E. bieneusi* occurrence and each factor.

## 125 **Nucleotide sequence accession numbers**

126 Representative nucleotide sequences of *E. bieneusi* isolates were deposited in  
127 GenBank under accession numbers from MG581429–MG581432 for ITS sequences  
128 and MH142189–MH142213 for the microsatellite (MS1, MS3, and MS7) and  
129 minisatellite (MS4) loci.

130

## 131 **Results**

### 132 **Occurrence of *E. bieneusi* in Tibetan pigs**

133 Of the 266 Tibetan pigs sampled 83 (31.3%) were PCR-positive for *E. bieneusi*.  
134 The epidemiology and genotypes of *E. bieneusi* in different areas are given in Table 2.  
135 Infection rates detected in Tibetan pigs were 25.4%, 56% and 26.6% in Kang ding, Ya  
136 an and Qiong lai, respectively. Infection rates by age and gender are given in Table 1.  
137 Differences between the three areas were significant ( $\chi^2=17.648$ ,  $df =2$ ,  $p<0.01$ ). In  
138 addition, the female Tibetan pig groups (17.7%, 47/266,) had a higher *E. bieneusi*  
139 prevalence than the male groups (13.5%, 36/266,). The difference in infection rate  
140 was also significant ( $\chi^2=8.906$ ,  $df =1$ ,  $P=0.003$ ); however, in the present study, high  
141 infection rates were observed in 1–2 year-old pigs (41.51%, 22/53) and 0–1 year-olds  
142 (33.33%, 61/183); however, these rates were not significantly different ( $\chi^2 = 1.240$ ,  $df$   
143  $=1$ ,  $P>0.05$ ).

144 Table1 .Factors associated with prevalence of *Enterocytozoon bieneusi* in Tibetan  
145 pigs in southwestern China

| Factor     | Category | No. tested | No. positive | (%)(95%CI)         | P-Value |
|------------|----------|------------|--------------|--------------------|---------|
| Region     | Kangding | 201        | 51           | 25.37(0.193-0.314) | <0.01   |
|            | Qionglai | 15         | 4            | 26.67(0.013-0.520) |         |
|            | Yaan     | 50         | 28           | 56.00(0.417-0.703) |         |
| Age(years) | 0-1      | 183        | 61           | 33.33(0.264-0.402) | 0.318   |
|            | 1-2      | 53         | 22           | 41.51(0.278-0.552) |         |
| Gender     | Male     | 82         | 47           | 57.32(0.464-0.683) | 0.003   |
|            | Female   | 184        | 36           | 19.57(0.138-0.254) |         |
| Total      |          | 266        | 83           | 31.20(0.256-0.368) |         |

146

147 **Genotype distribution of *E. bieneusi* in Tibetan pigs**

148 Nucleotide sequences from ITS-PCR were obtained from the 83 *E. bieneusi*-  
149 positive specimens. Four genotypes were detected, including two known genotypes  
150 (EbpC, Henan-IV) and two novel genotypes, which were named SCT01 and SCT02  
151 (Table2). Genotype EbpC was the most prevalent (21.8%, 58/266), and was detected  
152 in samples from all three cities. Genotype Henan-IV was only found in Kang ding  
153 (8.6%, 23/266). The novel genotypes SCT01 (0.3%, 1/266) and SCT02 (0.3%, 1/266)  
154 were only found in single specimens, both of which came from Ya an, and are the first  
155 newly-detected *E. bieneusi* genotypes from Tibetan pigs.

156 Table 2. Occurrence and genotypes of *E. bieneusi* in Tibetan pigs from different cities  
157 in southwest China.

| Region   | Farm ID | Prevalence (%) | Genotypes (n)                                 |
|----------|---------|----------------|-----------------------------------------------|
| Kangding | Farm 1  | 31/102(30.40)  | EbpC(18),Henan-IV(n=13)                       |
|          | Farm 2  | 20/99(20.20)   | EbpC(12),Henan-IV(n=8)                        |
| Yaan     | Farm 3  | 14/28(50.00)   | EbpC(n=14)                                    |
|          | Farm 4  | 10/22(45.45)   | EbpC(n=12),SCT01(n=1),SCT02(n=1)              |
| Qionglai | Farm 5  | 4/15(26.67)    | EbpC(n=4)                                     |
| Total    |         | 83/266(31.20)  | EbpC(58),Henan-IV(n=23),SCT01(n=1),SCT02(n=1) |

158

## 159 **Phylogenetic relationships of *E. bieneusi* ITS genotypes**

160 Phylogenetic analysis based on ITS gene sequences, the four *E. bieneusi* genotypes  
161 obtained from the present study (two known and two novel genotypes) were classed  
162 as a single group (group 1) and further clustered into subgroup 1d, indicating zoonotic  
163 potential (Fig 1).



164 Fig 1. Phylogenetic relationship of *Enterocytozoon bieneusi* groups, the relationship between *E.*  
165 *bieneusi* genotypes identified in this study and other known genotypes deposited in the GenBank  
166 was inferred by a neighbor-joining analysis of ITS sequences based on genetic distance by the  
167 Kimura-2-parameter model. The numbers on the branches represent percent bootstrapping values  
168 from 1,000 replicates, with more than 50% shown in tree. Each sequence is identified by its  
169 accession number, genotype designation, and host origin. Genotypes with black triangles and open  
170 triangle are novel and known genotypes identified in this study, respectively.

171

172

### 173 **Multilocus genotyping of *E. bieneusi***

174 Positive specimens were further characterized by PCR analyses of MS4, MS1, MS3  
175 and MS7 to improve taxonomy and population genotypes of *E. bieneusi*. 47, 48, 23  
176 and 47 *E. bieneusi* isolates were amplified at the MS1, MS3, MS4, and MS7 loci,  
177 respectively, but only 12 samples were PCR-positive simultaneously at all four loci.  
178 Four distinct MLGs were observed in Henan-IV and six distinct MLGs in EbpC,  
179 named MLG1-4 and MLG5-10, respectively (Table 3). These results reveal high  
180 genetic diversity in the Henan-IV and EbpC genotypes of *E. bieneusi* in Tibetan pigs.  
181 Table3 Multilocus characterization of *Enterocytozoon bieneusi* isolates in Tibetan  
182 pigs in Southwestern China

183

## 184 Discussion

185 In the present study, infection rates of varied between 25.4%-56% in different  
 186 districts, with an overall infection rate of 31.2%. This rate is lower than the  
 187 documented prevalence of *E. bieneusi* for: wild boars in Sichuan province, China  
 188 (41.2%), domestic pigs in Jilin province, China (45.1%), wild boars in central Europe  
 189 (33.3%) and pigs in the State of Rio de Janeiro, Brazil (59.3%)<sup>[14, 15, 22, 23]</sup>. However,  
 190 infection rates recorded in this study were higher than those for pigs in Jilin, China  
 191 (16.4%), central Thailand (28.1%) and Japan (30%)[14, 16, 22]. Differences in  
 192 infection rates between these studies may be largely attributable to climate and  
 193 farming mode. Prevalences also varied across sample sites. Kang ding, the only site  
 194 on the Western Sichuan Plateau, had a prevalence of 25.4%, possibly reflecting the

| ITS genotype | Multilocus genotype |           |          |           | GenBank accession Nos.              | MLGs  | No. of MLGs |
|--------------|---------------------|-----------|----------|-----------|-------------------------------------|-------|-------------|
|              | MS1                 | MS3       | MS4      | MS7       |                                     |       |             |
| Henan-IV     | Type II*            | Type I*   | Type III | Type II   | MH142190,MH142204,MH142200,MH142212 | MLG1  | 1           |
| Henan-IV     | Type I              | Type III* | Type III | Type II   | MH142193,MH142205,MH142200,MH142212 | MLG2  | 1           |
| Henan-IV     | Type I              | Type I*   | Type II* | Type I*   | MH142193,MH142204,MH142199,MH142210 | MLG3  | 1           |
| Henan-IV     | Type II*            | Type II*  | Type II* | Type II   | MH142195,MH142206,MH142199,MH142212 | MLG4  | 2           |
| Ebpc         | Type II*            | Type I*   | Type II* | Type II   | MH142196,MH142204,MH142199,MH142209 | MLG5  | 2           |
| Ebpc         | Type X*             | Type I*   | Type IV* | Type I*   | MH142189,MH142204,MH142203,MH142213 | MLG6  | 1           |
| Ebpc         | Type I              | Type I*   | Type II* | Type II   | MH142193,MH142204,MH142199,MH142212 | MLG7  | 1           |
| Ebpc         | Type II*            | Type I*   | Type I   | Type IV*  | MH142196,MH142204,MH142201,MH142213 | MLG8  | 1           |
| Ebpc         | Type III*           | Type IV*  | Type I   | Type III* | MH142194,MH142207,MH142201,MH142209 | MLG9  | 1           |
| Ebpc         | Type I              | Type IV*  | Type I   | Type II   | MH142193,MH142207,MH142201,MH142209 | MLG10 | 1           |

195 area's high temperatures, and UV radiation, which may limit survival of *E. bieneusi*  
196 spores and reduce transmission. Other factors influencing infection levels may include  
197 geo-ecological conditions, feeding/herd densities, herd management, sample size, and  
198 the condition of host animals. Differences in prevalence in Tibetan pigs between Ya  
199 an and Kang ding are thought to reflect differences between traditional and modern  
200 herd management and breeding technologies.

201 Of the four genotypes identified in this study EbpC was the most prevalent (21.8%,  
202 58/266), and has been found in a number of animals, including cattle, dogs, cats,  
203 birds, non-human primates, bears, squirrels, sheep, foxes, deer, and humans[3, 5, 13,  
204 23-28]. EbpC is the prevalent *E. bieneusi* genotype associated with pig infection in  
205 China, reflecting *E. bieneusi*'s dominance as a porcine parasite. In addition, we also  
206 detected 26 records of Henan-IV (solely in Ya an), a zoonotic genotype associated  
207 with human infections in Henan province in China, and thus far only recorded from  
208 China, where it demonstrates strict host specificity[29], occurring only in pigs and  
209 humans. To the best our knowledge, the two genotypes EbpC and Henan-IV, which  
210 were examined for the first time in Tibetan pigs in the present study, which may be a  
211 key reservoir host of these genotypes (Table 4).

212 ITS gene sequence analysis revealed two novel genotypes, SCT01 (n=1) and  
213 SCT02 (n=1), both of which were detected in Ya an and clustered into group 1  
214 zoonotic genotypes with public health significance. Other genotypes in this group  
215 include Henan-III in humans and EbpC from humans or wild boars [13, 29, 30].  
216 Modes of transmission and zoonotic potential of *E. bieneusi* genotypes remain poorly

217 known, and further molecular epidemiology studies are required. MLST holds  
 218 promise for ongoing investigation of *E. bieneusi* taxonomy and genetic diversity[12].  
 219 Nine, five, three and four novel genotypes were detected at MS1, MS3, MS4 and MS7  
 220 loci, respectively. Analysis of 12 samples at four gene loci identified eight novel

| Genotype (Synonym)          | Host              | Location     | Isolate | Reference  |
|-----------------------------|-------------------|--------------|---------|------------|
| EbpC (E, Peru4, WL13, WL17) | Pig               | Shanghai     | 3       | [12]       |
|                             | Pig               | Heilongjiang | 10      | [12]       |
|                             | Pig               | Heilongjiang | 3       | [31]       |
|                             | Pig               | Heilongjiang | 3       | [32]       |
|                             | Pig               | Jilin        | 1       | [33]       |
|                             | Pig               | Mongolia     | 1       | [33]       |
|                             | Tibetan pig       | Sichuan      | 58      | This study |
|                             | Red panda         | Shanxi       | 5       | [34]       |
|                             | Human             | Shanghai     | 1       | [35]       |
|                             | Human             | Henan        | 39      | [29]       |
|                             | Human             | Heilongjiang | 11      | [36]       |
|                             | Human,pig,Monkey  | Guangxi      | 4       | [37]       |
|                             | Squirrel          | Sichuan      | 3       | [25]       |
|                             | Wild boar         | Sichuan      | 85      | [30]       |
|                             | nonhuman primates | Hebei        | 1       | [38]       |
|                             | nonhuman primates | Hubei        | 3       | [38]       |
|                             | nonhuman primates | Hunan        | 4       | [38]       |
| nonhuman primates           | Being             | 2            | [38]    |            |

221 MLGs, including three genotype EbpC MLGs and five genotype Henan-IV MLGs  
 222 (Table 3).

223

224

225

226 Table4. Host ranges and geographical distribution of *Enterocytozoon bieneusi*

227 genotype in this study in China

|          |                   |                |    |            |
|----------|-------------------|----------------|----|------------|
|          | nonhuman primates | Henan          | 5  | [39]       |
|          | Water             | Shanghai       | 37 | [40]       |
|          | Wastewater        | Shanghai       | 2  | [41]       |
|          | Wastewater        | Shanghai       | 2  | [42]       |
|          | Wastewater        | Shandong       | 1  | [41]       |
|          | Wastewater        | Hubei          | 5  | [41]       |
|          | Camel             | Xinjiang       | 23 | [43]       |
|          | Fox               | Heilongjiang   | 5  | [44]       |
|          | Chicken           | Heilongjiang   | 2  | [31]       |
|          | Dog               | Heilongjiang   | 2  | [45]       |
|          | Dog               | Shanxi         | 1  | [46]       |
|          | Cattle            | Henan, Ningxia | 6  | [47]       |
|          | Cattle            | Hubei, Tianjin | 1  | [48]       |
|          | Calve             | Xinjiang       | 2  | [49]       |
|          | Deer              | Henan          | 4  | [50]       |
|          | Deer              | Henan          | 3  | [51]       |
|          | Deer              | Jilin          | 1  | [51]       |
|          | Human             | Henan          | 1  | [29]       |
|          | Human             | Heilongjiang   | 3  | [36]       |
|          | Chicken           | Jilin          | 2  | [31]       |
|          | Camel             | Xinjiang       | 1  | [43]       |
|          | Horse             | Xinjiang       | 21 | [52]       |
|          | Cattle            | Xinjiang       | 2  | [49]       |
| Henan-IV | nonhuman primates | Hebei          | 2  | [38]       |
|          | nonhuman primates | Shanxi         | 1  | [38]       |
|          | nonhuman primates | Shanghai       | 1  | [38]       |
|          | Pig               | Heilongjiang   | 5  | [32]       |
|          | Tibetan pig       | Sichuan        | 23 | This study |
| SCT01    | Tibetan pig       | Sichuan        | 1  | This study |
| SCT02    | Tibetan pig       | Sichuan        | 1  | This study |

228

## 229 **Conclusions**

230 This study revealed an average *E. bieneusi* infection rate of 31.2% in three cities

231 in Sichuan province, and is the first report of EbpC and Henan-IV in Tibetan pigs in

232 China. Genetic diversity was characterized using MLST, and ten MLGs were  
233 identified. These results identify Tibetan pigs as possible vectors for zoonotic  
234 transmission of human microsporidiosis; Tibetan pigs widespread use and frequency  
235 of human contact make them a significant public health risk in southwest China.  
236 Thus, measures are needed to control the transmission of *E. bienewsi* and to develop  
237 effective vaccines and drugs for use in the event of widespread human  
238 microsporidiosis.

239

## 240 Reference

241

- 242 1. Didier ES, Weiss LM: Microsporidiosis: current status. *Current Opinion in*  
243 *Infectious Diseases* 2006, 19(5):485.
- 244 2. Didier ES, Weiss LM: Microsporidiosis: not just in AIDS patients. *Current*  
245 *Opinion in Infectious Diseases* 2011, 24(5):490-495.
- 246 3. Wu J, Han JQ, Shi LQ, Zou Y, Li Z, Yang JF, Huang CQ, Zou FC:  
247 Prevalence, genotypes, and risk factors of *Enterocytozoon bienewsi* in Asiatic  
248 black bear (*Ursus thibetanus*) in Yunnan Province, Southwestern China.  
249 *Parasitology Research* 2018(6):1-7.
- 250 4. Zhang Q, Cai J, Li P, Wang L, Guo Y, Li C, Lei M, Feng Y, Xiao L:  
251 *Enterocytozoon bienewsi* genotypes in Tibetan sheep and yaks. *Parasitology*  
252 *Research* 2018, 117(1-2):1-7.
- 253 5. Zhang XX, Cong W, Lou ZL, Ma JG, Zheng WB, Yao QX, Zhao Q, Zhu XQ:  
254 Prevalence, risk factors and multilocus genotyping of *Enterocytozoon bienewsi*  
255 in farmed foxes (*Vulpes lagopus*), Northern China. *Parasites & Vectors* 2016,  
256 9(1):1-7.
- 257 6. Santã-N M, Fayer R: Microsporidiosis: *Enterocytozoon bienewsi* in

- 258 domesticated and wild animals. *Research in Veterinary Science* 2011,  
259 90(3):363-371.
- 260 7. Zhao GH, Du SZ, Wang HB, Hu XF, Deng MJ, Yu SK, Zhang LX, Zhu XQ:  
261 First report of zoonotic *Cryptosporidium spp.*, *Giardia intestinalis* and  
262 *Enterocytozoon bieneusi* in golden takins (*Budorcas taxicolor bedfordi*).  
263 *Infection Genetics & Evolution* 2015, 34:394-401.
- 264 8. Yan Z, Koehler AV, Tao W, Haydon SR, Gasser RB: First detection and  
265 genetic characterisation of *Enterocytozoon bieneusi* in wild deer in  
266 Melbourne's water catchments in Australia. *Parasites & Vectors* 2018,  
267 11(1):2.
- 268 9. Zhong Z, Tian Y, Song Y, Deng L, Li J, Ren Z, Ma X, Gu X, He C, Geng Y:  
269 Molecular characterization and multi-locus genotypes of *Enterocytozoon*  
270 *bieneusi* from captive red kangaroos (*Macropus Rfus*) in Jiangsu province,  
271 China. *Plos One* 2017, 12(8):e0183249.
- 272 10. Zhao W, Wang J, Yang Z, Liu A: Dominance of the *Enterocytozoon bieneusi*  
273 genotype BEB6 in red deer (*Cervus elaphus*) and Siberian roe deer (*Capreolus*  
274 *pygargus*) in China and a brief literature review. *Parasite-journal De La*  
275 *Societe Francaise De Parasitologie* 2017, 24(5):54.
- 276 11. Deng L, Li W, Zhong Z, Gong C, Liu X, Huang X, Xiao L, Zhao R, Wang W,  
277 Feng F: Molecular characterization and multilocus genotypes of  
278 *Enterocytozoon bieneusi* among horses in southwestern China. *Parasites &*  
279 *Vectors* 2016, 9(1):561.
- 280 12. Feng Y, Li N, Dearen T, Lobo ML, Matos O, Cama V, Xiao L: Development  
281 of a multilocus sequence typing tool for high-resolution genotyping of  
282 *Enterocytozoon bieneusi*. *Applied & Environmental Microbiology* 2011,  
283 77(14):4822-4828.
- 284 13. Zhong Z, Li W, Deng L, Song Y, Wu K, Tian Y, Huang X, Hu Y, Fu H, Geng  
285 Y: Multilocus genotyping of *Enterocytozoon bieneusi* derived from nonhuman  
286 primates in southwest China. *Plos One* 2017, 12(5):e0176926.
- 287 14. Němejc K, Sak B, Květoňová D, Hanzal V, Janiszewski P, Forejtek P, Rajský

- 288 D, Kotková M, Ravaszová P, Mcevoy J: Prevalence and diversity of  
289 *Encephalitozoon spp.* and *Enterocytozoon bieneusi* in wild boars (*Sus scrofa*)  
290 in Central Europe. Parasitology Research 2014, 113(2):761.
- 291 15. Fiuza VRS, Oliveira FCR, Fayer R, Santín M: First report of *Enterocytozoon*  
292 *bieneusi* in pigs in Brazil. Parasitology International 2015, 64(4):18-23.
- 293 16. Prasertbun R, Mori H, Pintong AR, Sanyanusin S, Popruk S, Komalamisra C,  
294 Changbunjong T, Buddhirongawatr R, Sukthana Y, Mahittikorn A: Zoonotic  
295 potential of *Enterocytozoon* genotypes in humans and pigs in Thailand.  
296 Veterinary Parasitology 2017, 233:73-79.
- 297 17. Li W, Li Y, Li W, Yang J, Song M, Diao R, Jia H, Lu Y, Zheng J, Zhang X:  
298 Genotypes of *Enterocytozoon bieneusi* in livestock in China: high prevalence  
299 and zoonotic potential. Plos One 2014, 9(5):e97623.
- 300 18. Zhao W, Zhang W, Yang F, Cao J, Liu H, Yang D, Shen Y, Liu A: High  
301 prevalence of *Enterocytozoon bieneusi* in asymptomatic pigs and assessment  
302 of zoonotic risk at the genotype level. Applied & Environmental Microbiology  
303 2014, 80(12):3699-3707.
- 304 19. Sulaiman IM, Fayer R, Lal AA, Trout JM, Iii FWS, Xiao L: Molecular  
305 Characterization of Microsporidia Indicates that Wild Mammals Harbor Host-  
306 Adapted *Enterocytozoon spp.* as well as Human-Pathogenic *Enterocytozoon*  
307 *bieneusi*. Applied & Environmental Microbiology 2003, 69(8):4495-4501.
- 308 20. Kumar S, Stecher G, Tamura K: MEGA7: Molecular Evolutionary Genetics  
309 Analysis Version 7.0 for Bigger Datasets. Molecular Biology & Evolution  
310 2016, 33(7):1870.
- 311 21. Santín M, Fayer R: *Enterocytozoon bieneusi* genotype nomenclature based on  
312 the internal transcribed spacer sequence: a consensus. Journal of Eukaryotic  
313 Microbiology 2009, 56(1):34-38.
- 314 22. Abe N, Kimata I: Molecular survey of *Enterocytozoon bieneusi* in a Japanese  
315 porcine population. Vector Borne & Zoonotic Diseases 2010, 10(4):425.
- 316 23. Piekarska J, Kicia M, Wesoła, Owska M, Kopacz A, Gorczykowski M,  
317 Szczepankiewicz B, Kvě AM, Sak B: Zoonotic microsporidia in dogs and cats



- 318 in Poland. *Veterinary Parasitology* 2017, 246:108-111.
- 319 24. Tavalla M, Mardanikateki M, Abdizadeh R, Soltani S, Saki J: Molecular  
320 diagnosis of potentially human pathogenic *Enterocytozoon bieneusi* and  
321 *Encephalitozoon* species in exotic birds in Southwestern Iran. *J Infect Public*  
322 *Health* 2017.
- 323 25. Deng L, Li W, Yu X, Gong C, Liu X, Zhong Z, Xie N, Lei S, Yu J, Fu H: First  
324 Report of the Human-Pathogenic *Enterocytozoon bieneusi* from Red-Bellied  
325 Tree Squirrels (*Callosciurus erythraeus*) in Sichuan, China. *Plos One* 2016,  
326 11(9):e0163605.
- 327 26. Ke S, Li M, Wang X, Li J, Karim MR, Wang R, Zhang L, Jian F, Ning C:  
328 Molecular survey of *Enterocytozoon bieneusi* in sheep and goats in China.  
329 *Parasites & Vectors* 2016, 9(1):23.
- 330 27. Ding S, Huang W, Qin Q, Tang J, Liu H: Genotype Identification and  
331 Phylogenetic Analysis of *Enterocytozoon Bieneusi* Isolates from Stool  
332 Samples of Diarrheic Children. *Journal of Parasitology* 2018.
- 333 28. Tang C, Cai M, Wang L, Guo Y, Li N, Feng Y, Xiao L: Genetic diversity  
334 within dominant *Enterocytozoon bieneusi* genotypes in pre-weaned calves.  
335 *Parasites & Vectors* 2018, 11(1):170.
- 336 29. Wang L, Zhang H, Zhao X, Zhang L, Zhang G, Guo M, Liu L, Feng Y, Xiao  
337 L: Zoonotic *Cryptosporidium* species and *Enterocytozoon bieneusi* genotypes  
338 in HIV-positive patients on antiretroviral therapy. *Journal of Clinical*  
339 *Microbiology* 2013, 51(2):557.
- 340 30. Wei L, Lei D, Wu K, Huang X, Yuan S, Su H, Hu Y, Fu H, Zhong Z, Peng G:  
341 Presence of zoonotic *Cryptosporidium scrofarum* , *Giardia duodenalis*  
342 assemblage A and *Enterocytozoon bieneusi* genotypes in captive Eurasian  
343 wild boars ( *Sus scrofa* ) in China: potential for zoonotic transmission.  
344 *Parasites & Vectors* 2017, 10(1):10.
- 345 31. Li W, Tao W, Jiang Y, Diao R, Yang J, Xiao L: Genotypic distribution and  
346 phylogenetic characterization of *Enterocytozoon bieneusi* in diarrheic chickens  
347 and pigs in multiple cities, China: potential zoonotic transmission. *Plos One*

- 348 2014, 9(9):e108279-e108279.
- 349 32. Wan Q, Lin Y, Mao Y, Yang Y, Li Q, Zhang S, Jiang Y, Tao W, Li W: High  
350 Prevalence and Widespread Distribution of Zoonotic *Enterocytozoon bieneusi*  
351 Genotypes in Swine in Northeast China: Implications for Public Health.  
352 Journal of Eukaryotic Microbiology 2016, 63(2):162.
- 353 33. Li W, Diao R, Yang J, Xiao L, Lu Y, Li Y, Song M: High diversity of human-  
354 pathogenic *Enterocytozoon bieneusi* genotypes in swine in northeast China.  
355 Parasitology Research 2014, 113(3):1147.
- 356 34. Tian GR, Zhao GH, Du SZ, Hu XF, Wang HB, Zhang LX, Yu SK: First report  
357 of *Enterocytozoon bieneusi* from giant pandas (*Ailuropoda melanoleuca*) and  
358 red pandas (*Ailurus fulgens*) in China. In: Infect Genet Evol 34, 32-352015:  
359 34, 32-35.
- 360 35. Wang L, Xiao L, Duan L, Ye J, Guo Y, Guo M, Liu L, Feng Y: Concurrent  
361 Infections of *Giardia duodenalis*, *Enterocytozoon bieneusi*, and *Clostridium*  
362 *difficile* in Children during a Cryptosporidiosis Outbreak in a Pediatric  
363 Hospital in China. PLoS Neglected Tropical Diseases, 7,9(2013-9-12) 2013,  
364 7(9):749-754.
- 365 36. Yang J, Song M, Wan Q, Li Y, Lu Y, Jiang Y, Tao W, Li W: *Enterocytozoon*  
366 *bieneusi* genotypes in children in Northeast China and assessment of risk of  
367 zoonotic transmission. Journal of Clinical Microbiology 2014, 52(12):4363.
- 368 37. Liu H, Jiang Z, Yuan Z, Yin J, Wang Z, Yu B, Zhou D, Shen Y, Cao J:  
369 Infection by and genotype characteristics of *Enterocytozoon bieneusi* in  
370 HIV/AIDS patients from Guangxi Zhuang autonomous region, China. Bmc  
371 Infectious Diseases 2017, 17(1):684.
- 372 38. Karim MR, Dong H, Li T, Yu F, Li D, Zhang L, Li J, Wang R, Li S, Li X:  
373 Predomination and new genotypes of *Enterocytozoon bieneusi* in captive  
374 nonhuman primates in zoos in China: high genetic diversity and zoonotic  
375 significance. Plos One 2015, 10(2):e0117991.
- 376 39. Karim MR, Wang R, Dong H, Zhang L, Li J, Zhang S, Rume FI, Qi M, Jian F,  
377 Sun M: Genetic Polymorphism and Zoonotic Potential of *Enterocytozoon*

- 378 *bieneusi* from Nonhuman Primates in China. Applied & Environmental  
379 Microbiology 2014, 80(6):1893.
- 380 40. Hu Y, Feng Y, Huang C, Xiao L: Occurrence, Source, and Human Infection  
381 Potential of *Cryptosporidium* and *Enterocytozoon bieneusi* in Drinking Source  
382 Water in Shanghai, China during a Pig Carcass Disposal Incident.  
383 Environmental Science & Technology 2014, 48(24):14219-14227.
- 384 41. Li N, Xiao L, Wang L, Zhao S, Zhao X, Duan L, Guo M, Liu L, Feng Y:  
385 Molecular surveillance of *Cryptosporidium spp.*, *Giardia duodenalis*, and  
386 *Enterocytozoon bieneusi* by genotyping and subtyping parasites in wastewater.  
387 PLoS Neglected Tropical Diseases,6,9(2012-9-6) 2012, 6(9):e1809.
- 388 42. Ma J, Feng Y, Hu Y, Villegas EN, Xiao L: Human infective potential of  
389 *Cryptosporidium spp.*, *Giardia duodenalis* and *Enterocytozoon bieneusi* in  
390 urban wastewater treatment plant effluents. Journal of Water & Health 2016,  
391 14(3).
- 392 43. Qi M, Li J, Zhao A, Cui Z, Wei Z, Jing B, Zhang L: Host specificity of  
393 *Enterocytozoon bieneusi* genotypes in Bactrian camels ( *Camelus bactrianus* )  
394 in China. Parasites & Vectors 2018, 11(1):219.
- 395 44. Zhao W, Zhang W, Yang Z, Liu A, Zhang L, Yang F, Wang R, Ling H:  
396 Genotyping of *Enterocytozoon bieneusi* in Farmed Blue Foxes (*Alopex*  
397 *lagopus*) and Raccoon Dogs (*Nyctereutes procyonoides*) in China. Plos One  
398 2015, 10(11):e0143992.
- 399 45. Li W, Li Y, Song M, Lu Y, Yang J, Tao W, Jiang Y, Wan Q, Zhang S, Xiao  
400 L: Prevalence and genetic characteristics of *Cryptosporidium* , *Enterocytozoon*  
401 *bieneusi* and *Giardia duodenalis* in cats and dogs in Heilongjiang province,  
402 China. Veterinary Parasitology 2015, 208(3-4):125-134.
- 403 46. Karim MR, Dong H, Yu F, Jian F, Zhang L, Wang R, Zhang S, Rume FI,  
404 Ning C, Xiao L: Genetic diversity in *Enterocytozoon bieneusi* isolates from  
405 dogs and cats in China: host specificity and public health implications. Journal  
406 of Clinical Microbiology 2014, 52(9):3297-3302.
- 407 47. Li J, Luo N, Wang C, Meng Q, Cao J, Cui Z, Huang J, Wang R, Zhang L:

- 408 Occurrence, molecular characterization and predominant genotypes of  
409 *Enterocytozoon bieneusi* in dairy cattle in Henan and Ningxia, China. Parasites  
410 & Vectors 2016, 9(1):1-5.
- 411 48. Hu S, Liu Z, Yan F, Zhang Z, Zhang G, Zhang L, Jian F, Zhang S, Ning C,  
412 Wang R: Zoonotic and host-adapted genotypes of *Cryptosporidium spp.*,  
413 *Giardia duodenalis* and *Enterocytozoon bieneusi* in dairy cattle in Hebei and  
414 Tianjin, China. Veterinary Parasitology 2017:68-73.
- 415 49. Meng Q, Bo J, Jian F, Wang R, Zhang S, Wang H, Ning C, Zhang L:  
416 Dominance of *Enterocytozoon bieneusi* genotype J in dairy calves in Xinjiang,  
417 Northwest China. Parasitology International 2017, 66(1):960-963.
- 418 50. Zhang Z, Huang J, Karim MR, Zhao J, Dong H, Ai W, Li F, Zhang L, Wang  
419 R: Zoonotic *Enterocytozoon bieneusi* genotypes in Pere David's deer  
420 (*Elaphurus davidianus*) in Henan, China. Experimental Parasitology 2015,  
421 155:46-48.
- 422 51. Huang J, Zhang Z, Yang Y, Wang R, Zhao J, Jian F, Ning C, Zhang L: New  
423 Genotypes of *Enterocytozoon bieneusi* Isolated from Sika Deer and Red Deer  
424 in China. Frontiers in Microbiology 2017, 8.
- 425 52. Qi M, Wang R, Wang H, Jian F, Li J, Zhao J, Dong H, Zhu H, Ning C, Zhang  
426 L: *Enterocytozoon bieneusi* Genotypes in Grazing Horses in China and Their  
427 Zoonotic Transmission Potential. Journal of Eukaryotic Microbiology 2016,  
428 63(5):591-597.
- 429

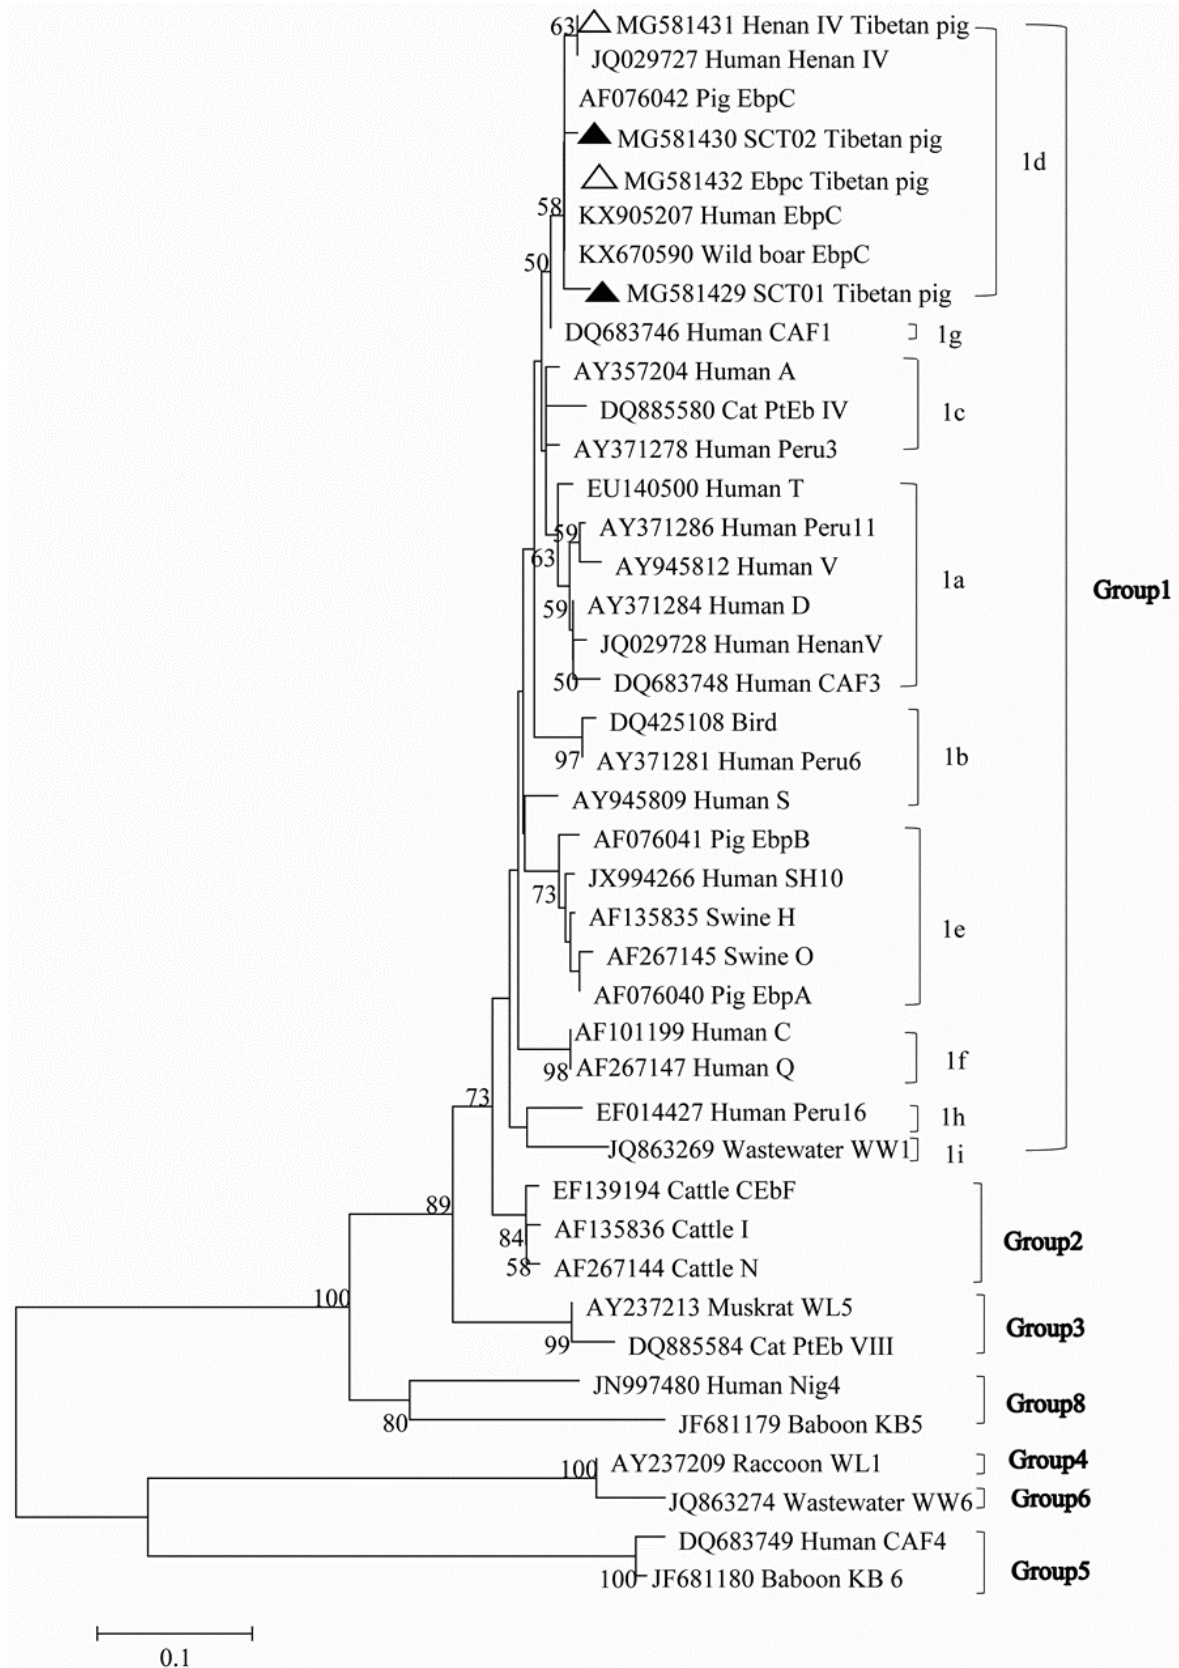

Source: https://biorxiv.org/content/biorxiv/early/2018/05/21/327767.full-text.pdf
